# Supplementary material for: Two-dimensional topological insulators exfoliated from Na3Bi-like Dirac semimetals
Source: Royal Society of Chemistry journal article supplement (doi:10.1039/d1cp00736j), 2021-01-01
Supplement: d1cp00736j1.pdf [file d1cp00736j1.pdf]

## Supporting Information

### Two-dimensional topological insulators exfoliated from

#### Na<sub>3</sub>Bi-like Dirac semimetals

Xiaoqiu Guo <sup>a#</sup>, Ruixin Yu <sup>a#</sup>, Jingwen Jiang <sup>a</sup>, Zhuang Ma <sup>a</sup>, Xiuwen Zhang <sup>\*a</sup>

<sup>a</sup> Shenzhen Key Laboratory of Flexible Memory Materials and Devices, College of Physics and Optoelectronic

Engineering, Shenzhen University, Shenzhen, 518060, China

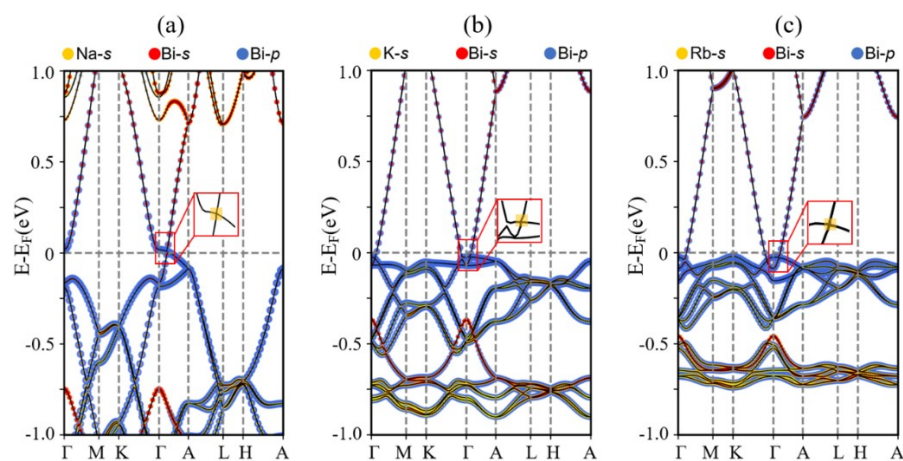

Fig. S1 Electronic structures of bulk  $P\bar{3}c1$  phase of (a) Na<sub>3</sub>Bi, (b) K<sub>3</sub>Bi and (c) Rb<sub>3</sub>Bi from PBE + SOC. The dotted lines with different colors denote the band projection onto different atomic orbitals. The yellow squares indicate the positions of Dirac cones.

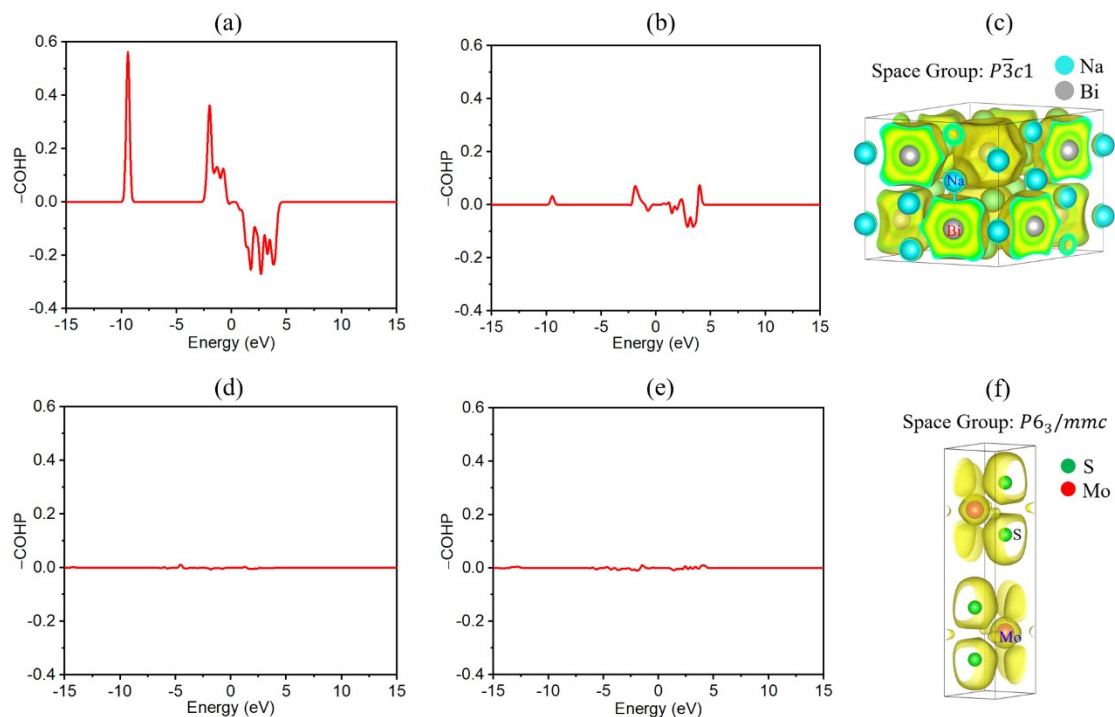

Fig. S2 Bonding/antibonding characters of the states of interlayer (a) Na-Bi, (b) Na-Na pairs in Na<sub>3</sub>Bi and interlayer

(d) Mo-S, (e) S-S pairs in  $\text{MoS}_2$ , as indicated by the calculated Crystal Orbital Hamiltonian Populations (COHPs). Electron localization function of (c)  $\text{Na}_3\text{Bi}$  and (f)  $\text{MoS}_2$  with isosurfaces of 0.2.  $-\text{COHP} > 0$ ,  $-\text{COHP} = 0$  and  $-\text{COHP} < 0$  mean the bonding, non-bonding and anti-bonding characters of each electronic state over the chemical bonds in the system, respectively.

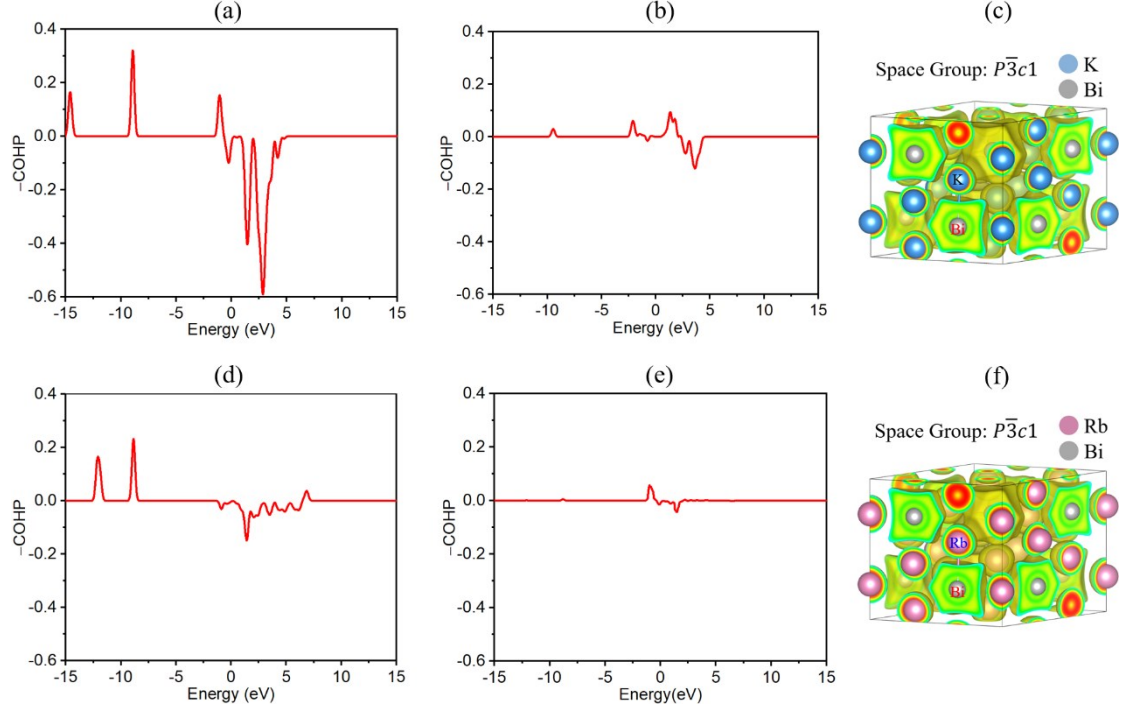

Fig. S3 Bonding/antibonding characters of the states of interlayer (a) K-Bi, (b) K-K pairs in  $\text{K}_3\text{Bi}$  and interlayer (d) Rb-Bi, (e) Rb-Rb pairs in  $\text{Rb}_3\text{Bi}$ , as indicated by the calculated COHPs. Electron localization function of (c)  $\text{K}_3\text{Bi}$  and (f)  $\text{Rb}_3\text{Bi}$  with isosurfaces of 0.2.  $-\text{COOP} > 0$ ,  $-\text{COOP} = 0$  and  $\text{COOP} < 0$  mean the bonding, non-bonding and antibonding characters of each electronic state over the chemical bonds in the system, respectively.

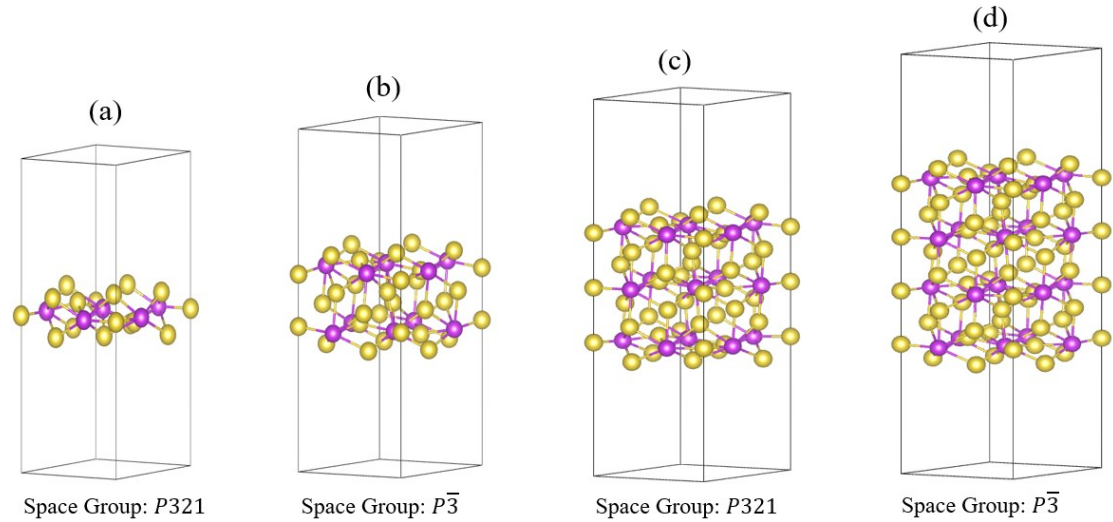

Fig. S4 Optimized structures of n-layer ( $n=1-4$ )  $\text{Na}_3\text{Bi}$ . The space group of monolayer, trilayer is  $P321$ , and that of bilayer, tetralayer is  $P3$ .

Table S1 Topological invariant ( $Z_2$ ) of n-layer ( $n = 1-4$ )  $\text{Na}_3\text{Bi}$  derived from the  $P6_3/mmc$  phase of  $\text{Na}_3\text{Bi}$ .

| $Z_2$      | $\text{Na}_3\text{Bi}$ |
|------------|------------------------|
| monolayer  | 1                      |
| bilayer    | 1                      |
| trilayer   | 1                      |
| tetralayer | 1                      |

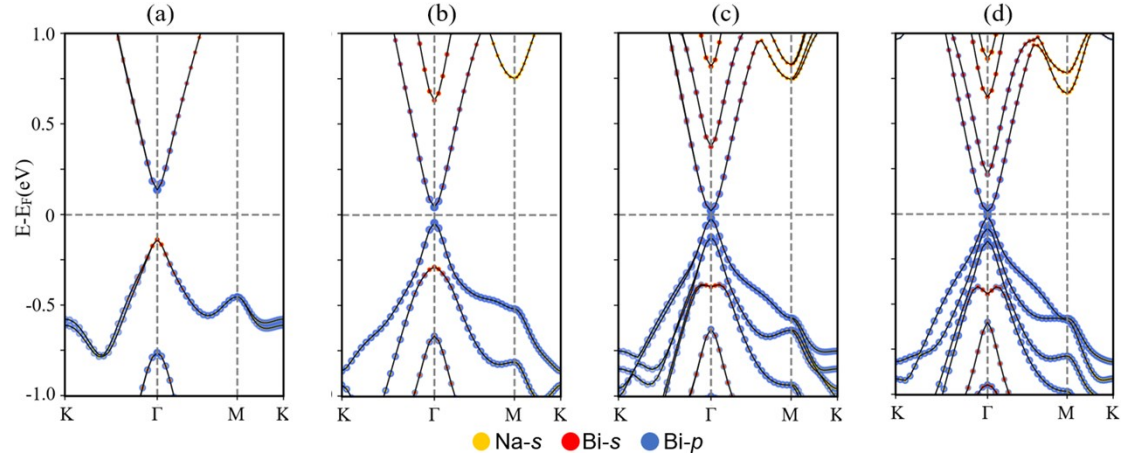

Fig. S5 Electronic structures of (a) monolayer, (b) bilayer, (c) trilayer and (d) tetralayer  $\text{Na}_3\text{Bi}$  derived from the  $P6_3/mmc$  phase of  $\text{Na}_3\text{Bi}$ , from PBE + SOC.

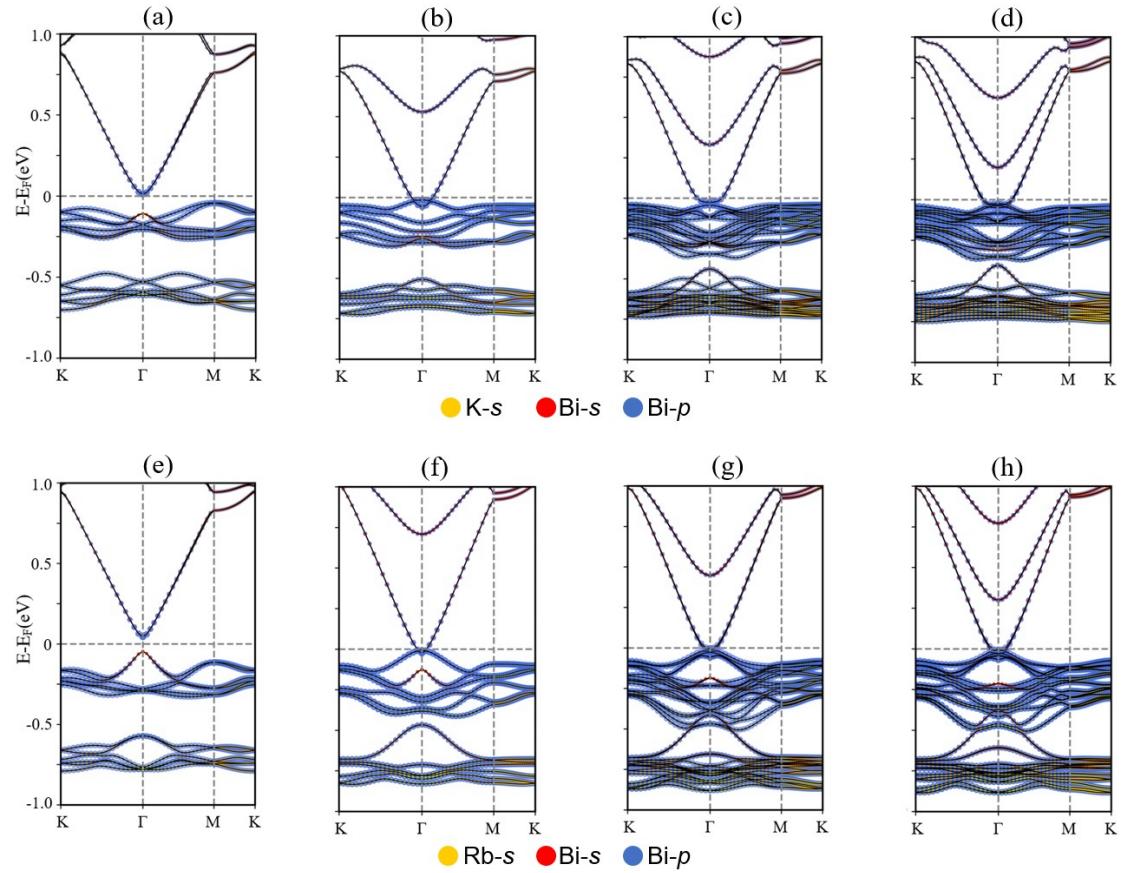

Fig. S6 Electronic structures of n-layer ( $n=1-4$ ) of (a-d)  $\text{K}_3\text{Bi}$  and (e-h)  $\text{Rb}_3\text{Bi}$  derived from the  $P\bar{3}c1$  phase, from PBE + SOC. The dotted lines with different colors denote the band projection onto different atomic orbitals.

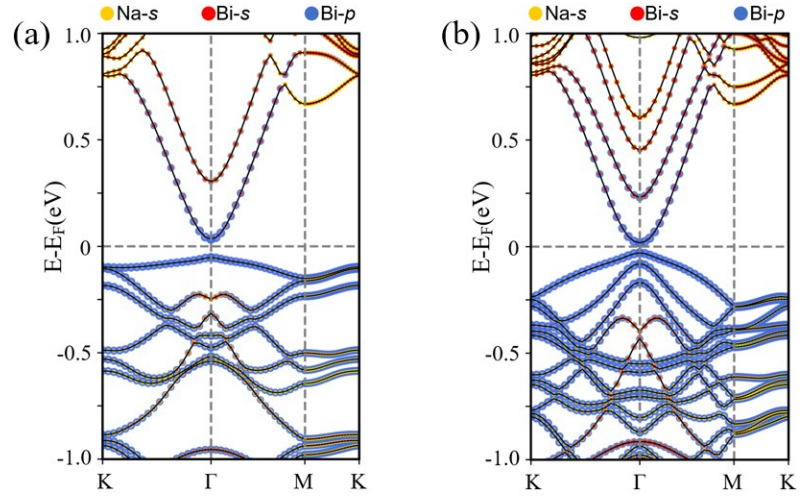

Fig. S7 Electronic structures of  $\text{Na}_3\text{Bi}$  ( $P\bar{3}c1$ ) with the maximum band gap under strain. The maximum band gaps of bilayer and tetralayer  $\text{Na}_3\text{Bi}$  under strain are 9.4% and 84% higher than the unstrained case. (a) Maximum band gap is achieved in bilayer at 14% expansion, (b) in tetralayer at 10% expansion.
